# Supplementary material for: Resample-smoothing of Voronoi intensity estimators
Source: Springer Nature journal article supplement (doi:10.1007/s11222-018-09850-0), 2019-01-19
Supplement: 11222_2018_9850_MOESM1_ESM.pdf [file 11222_2018_9850_MOESM1_ESM.pdf]

**Electronic Supplementary Material to the paper**  
***Resample-smoothing of Voronoi intensity***  
***estimators***

**M. Mehdi Moradi · Ottmar Cronie ·**  
**Ege Rubak · Raphael Lachieze-Rey ·**  
**Jorge Mateu · Adrian Baddeley**

Received: date / Accepted: date

---

M. Mehdi Moradi  
Institute of New Imaging Technologies (INIT), University Jaume I, Castellón, Spain  
ORCID: 0000-0003-3905-4498

Ottmar Cronie (Corresponding author)  
Department of Mathematics and Mathematical Statistics, Umeå University, Umeå, Sweden  
E-mail: ottmar.cronie@umu.se  
Tel.: +46-90-7865742  
ORCID: 0000-0002-6721-8608

Ege Rubak  
Department of Mathematical Sciences, Aalborg University, Aalborg, Denmark  
ORCID: 0000-0002-6675-533X

Raphael Lachieze-Rey  
Université Paris Descartes, Sorbonne Paris Cité, Paris, France

Jorge Mateu  
Department of Mathematics, University Jaume I, Castellón, Spain  
ORCID: 0000-0002-2868-7604

Adrian Baddeley  
Department of Mathematics & Statistics, Curtin University, Perth, Australia  
ORCID: 0000-0001-9499-8382

## 1 Proofs of the results in the paper

### 1.1 Proof of Lemma 1

Conditionally on  $\mathbf{x}$ , all  $\widehat{\rho}_i^V(u)$  are non-negative i.i.d. random variables. Hence, by the (conditional) law of large numbers,  $\widehat{\rho}_{p,m}^V(u)$  converges a.s. to the conditional expectation of  $\widehat{\rho}_i^V(u)$  given  $\mathbf{x}$ . By using equation (6) in the main text, we obtain that this conditional expectation is a.s. finite.

### 1.2 Proof of Theorem 1

A  $p$ -thinning of  $X$  is again stationary with intensity  $p\rho$ . By Daley and Vere-Jones (2008, Expression (11.3.2)),

$$G_{\theta_v X_p}(\cdot) = G_{(\theta_v X)_p}(\cdot) = G_{\theta_v X}(p \cdot + 1 - p) = G_X(p \cdot + 1 - p) = G_{X_p}(\cdot), \quad v \in S,$$

where  $G_X(\cdot)$  is the generating functional of  $X$ . Using Last (2010, Corollary 8.7) we immediately obtain that

$$\mathbb{E}[\widehat{\rho}_{p,m}^V(u)] = \frac{\mathbb{E}[\widehat{\rho}^V(u; X_p, S)]}{p} = \mathbb{E}[1/|\{\text{cell of } X_p \text{ containing } u\}|]/p = \frac{p\rho}{p} = \rho.$$

### 1.3 Proof of Theorem 2

We denote by  $x_u(X) \in X$  the centre of the Voronoi cell  $C_u(X)$ , the cell containing  $u \in \mathbb{R}^d$ . Let  $\varepsilon > 0$ ,  $\mu = \mu_u$  and  $\rho_- = \min_{v \in B(u, \varepsilon)} \rho(v)$ , such that  $\rho(v)/2 \leq \rho(v) - \mu\varepsilon \leq \rho_- \leq \rho(v)$  on  $B(u, \varepsilon)$ . Let  $X_-$  be obtained by independently removing/adding points at rate  $\rho_- - \rho(v)$ ,  $v \in \mathbb{R}^d$ . Note that  $X_-$  is a homogeneous Poisson process with intensity  $\rho_-$  and  $X_- \subseteq X$  on  $B(u, \varepsilon)$  a.s..

We call Voronoi neighbours in some configuration  $\mathbf{x}$  the centres of cells of  $\mathbf{x}$  which are neighbours of  $C_u(\mathbf{x})$ . Denote by  $R(\mathbf{x})$  the maximal Euclidean distance between  $x_u(\mathbf{x})$  and its Voronoi neighbours. Remark that if  $R(\mathbf{x}) \leq \varepsilon$ , then  $C_u(\mathbf{x}) \subseteq B(u, \varepsilon)$ . One can find a finite number of balls such that if any such ball contains a point of  $\mathbf{x}$ , then  $R(\mathbf{x}) \leq 1$ . Hence, using the void probabilities of  $X$ , we have at the scale  $\varepsilon$  for  $X$  that

$$\mathbb{P}(R(X) \geq \varepsilon) \leq C_d e^{-c_d \rho - \varepsilon^d}$$

for some  $C_d, c_d > 0$ .

Now, let  $\Omega$  be the event that  $X$  and  $X_-$  coincide on  $B(u, \varepsilon)$  and  $R(X) \leq \varepsilon$ . Conditionally on  $\Omega$ ,  $C_u(X) = C_u(X_-) \subseteq B(u, \varepsilon)$ . We obtain

$$\begin{aligned} \mathbf{1}_{\{\Omega^c\}} &\leq \mathbf{1}_{\{R(X) > \varepsilon\}} + \sum_{x \in X_- \cap B(u, \varepsilon)} \mathbf{1}_{\{x \text{ eliminated at thinning}\}}, \\ \mathbb{P}(\Omega^c) &\leq \mathbb{P}(R(X) > \varepsilon) + \int_{B(u, \varepsilon)} \mu \varepsilon dx \leq C_d e^{-c_d \rho - \varepsilon^d} + c \varepsilon^d \mu \varepsilon. \end{aligned}$$

Let further  $\kappa' = (1 - \kappa^{-1})^{-1} \leq d + 1$ . By Hölder's inequality and Theorem 1 we have that

$$\begin{aligned} |\mathbb{E}[\widehat{\rho}^V(u)] - \rho(u)| &\leq \left| \mathbb{E} \left[ \mathbf{1}_{\{\Omega\}} \frac{1}{|C_u(X)|} \right] - \rho(u) \right| + \mathbb{E} \left[ \mathbf{1}_{\{\Omega^c\}} \frac{1}{|C_u(X)|} \right] \\ &\leq \left| \mathbb{E} \left[ \mathbf{1}_{\{\Omega\}} \frac{1}{|C_u(X_-)|} \right] - \rho(u) \right| + (\mathbb{E}|C_u(X)|^{-\kappa})^{1/\kappa} \mathbb{P}(\Omega^c)^{1/\kappa'} \\ &\leq \underbrace{\mathbb{E} \left[ \frac{1}{|C_u(X_-)|} - \rho_- \right]}_{=0} + \mathbf{1}_{\{\Omega^c\}} \frac{1}{|C_u(X_-)|} + |\rho(u) - \rho_-| \\ &\quad + m(c_d \mu \varepsilon^d \varepsilon + C_d e^{-c_d \rho_- \varepsilon^d})^{1/\kappa'} \\ &\leq \mu \varepsilon + 2m(c_d \mu \varepsilon^d \varepsilon + C_d e^{-c_d \rho_- \varepsilon^d})^{1/\kappa'}. \end{aligned}$$

Setting  $\varepsilon = \rho_-^{-1/d} \log(\rho_-)^{2/d}$  and recalling that  $\rho(u)/2 \leq \rho_-$ , using that  $\kappa' \leq d + 1$ , proves the result for the original Voronoi intensity estimator.

As a  $p$ -thinning  $X_p$ ,  $p \in (0, 1]$ , of  $X$  is a Poisson process with intensity  $p\rho(\cdot)$ , we finally note that

$$\begin{aligned} p|\mathbb{E}[\widehat{\rho}_{p,m}^V(u)] - \rho(u)| &= |\mathbb{E}[\widehat{\rho}^V(u; X_p, \mathbb{R}^d)] - p\rho(u)| \\ &\leq \mu p^{-1} \varepsilon + 2m(c_d \mu p^{-1} \varepsilon^d \varepsilon + C_d e^{-c_d p \rho(u) \varepsilon^d})^{1/\kappa'}, \end{aligned}$$

since  $\mathbb{E}|C_u(X_p)|^{-\kappa} \leq \mathbb{E}|C_u(X)|^{-\kappa}$ .

#### 1.4 Proof of Theorem 3

Note first that

$$\begin{aligned} \text{Var}(\widehat{\rho}_{p,m}^V(u)) &= \frac{1}{(mp)^2} \sum_{i=1}^m \text{Var}(\widehat{\rho}_1^V(u)) + \frac{1}{(mp)^2} \sum_{i \neq j} \text{Cov}(\widehat{\rho}_i^V(u), \widehat{\rho}_j^V(u)) \quad (1) \\ &= \frac{1}{m} \text{Var}(\widehat{\rho}_1^V(u)/p) + \frac{m-1}{m} \text{Cov}(\widehat{\rho}_1^V(u)/p, \widehat{\rho}_2^V(u)/p) \\ &= \text{Var}(\widehat{\rho}_{p,1}^V(u)) \frac{1 + (m-1) \text{Corr}(\widehat{\rho}_1^V(u), \widehat{\rho}_2^V(u))}{m}, \end{aligned}$$

where Cov and Corr denote covariance and correlation, respectively. Since the variance is non-negative, by (1) we must have that  $\text{Corr}(\widehat{\rho}_1^V(u), \widehat{\rho}_2^V(u)) \geq -1/(m-1)$  for every single  $m \geq 1$ . Hence, the correlation must be non-negative, whereby  $\text{Var}(\widehat{\rho}_{p,1}^V(u))/m \leq \text{Var}(\widehat{\rho}_{p,m}^V(u)) \leq \text{Var}(\widehat{\rho}_{p,1}^V(u))$ ; this is obtained by setting  $\text{Corr}(\widehat{\rho}_1^V(u), \widehat{\rho}_2^V(u)) = 0, 1$  in expression (1). Also, letting  $m \rightarrow \infty$  in (1), the limit of (1) is given by  $\text{Cov}(\widehat{\rho}_1^V(u), \widehat{\rho}_2^V(u))/p^2$  since  $\text{Var}(\widehat{\rho}_1^V(u)) < \infty$ .

Regarding the variance tending to 0, it is sufficient to show it for  $m = 1$  since  $\text{Var}(\widehat{\rho}_{p,m}^V(u)) \leq \text{Var}(\widehat{\rho}_{p,1}^V(u))$ .

Let  $(X_p)_{p \in (0,1]}$  be a coupling such that  $X_p$  is non-increasing in terms of inclusion: assign independent  $U(0,1)$ -distributed labels to the points of  $X$  and generate  $X_p$  by keeping all points with labels smaller than  $p$ . For a bounded  $W$  there is a.s. some  $p_0 \in (0,1)$  such that  $X_p = \emptyset$  for all  $p \in (0, p_0)$ . Hence,  $\widehat{\rho}_{p,1}^V(u) = \widehat{\rho}^V(u; X_p, W)/p = 0/p = 0$  (by definition) for such  $p$ , which means that the limit  $\widehat{\rho}_{p,1}^V(u) \downarrow 0$  is deterministic. Since there are  $p \in (0,1]$  such that  $\mathbb{E}[\widehat{\rho}_{p,1}^V(u)^2] < \infty$ , by the dominated convergence theorem it follows that  $\text{Var}(\widehat{\rho}_{p,1}^V(u)) \rightarrow 0$  as  $p \rightarrow 0$ .

Consider a sequence of windows  $(W_p)_{p \in (0,1]}$  which increases (in terms of inclusion) as  $p$  decreases and satisfies  $\mathbb{E}[N(X_p \cap W_p)] = p \int_{W_p} \rho(u) du \rightarrow 0$  as  $p \rightarrow 0$ . This implies that  $\mathbb{P}(X_p \cap W_p \neq \emptyset) \rightarrow 0$  and writing  $\widehat{\rho}_{p,1}^V(u) = \widehat{\rho}_{p,1}^V(u; X_p, W_p)$ , we obtain that  $\mathbb{P}(\widehat{\rho}_{p,1}^V(u) \neq 0) = \mathbb{P}(X_p \cap W_p \neq \emptyset) \rightarrow 0$ . Since  $\widehat{\rho}_{p,1}^V(u) \leq \widehat{\rho}_{1,1}^V(u) = \widehat{\rho}^V(u)$  a.s., which has finite variance by assumption, and since  $\widehat{\rho}_{p,1}^V(u)$  is a.s. decreasing as  $p \rightarrow 0$  (even with changing study region), the monotone convergence theorem yields that  $\widehat{\rho}_{p,1}^V(u) \xrightarrow{L^2} 0$  as  $p \rightarrow 0$ , whereby  $\text{Var}(\widehat{\rho}_{p,1}^V(u)) \rightarrow 0$  as  $p \rightarrow 0$ .

### 1.5 Proof of Lemma 2

Recall that  $X_p$  is a homogeneous Poisson process with intensity  $p\rho$ . For a typical point of  $X_p$ , let  $\Delta_-$  and  $\Delta_+$  be the distances to the point's nearest neighbours to the left and to the right, respectively; they are independent and exponentially distributed with mean  $p\rho$ . Since  $\Delta_-/2$  and  $\Delta_+/2$  are independent and exponentially distributed with mean  $2p\rho$ , the typical cell size,  $\Delta_-/2 + \Delta_+/2$ , follows an Erlang/Gamma distribution with shape parameter 2 and rate  $2p\rho$ , whereby the density of  $P_{|\mathcal{V}_o(X_p)|}(\cdot)$  is given by  $f_{|\mathcal{V}_o(X_p)|}(t) = (2p\rho)^2 t e^{-2p\rho t}$ . Through equation (6) in the paper, we now obtain

$$\begin{aligned} \mathbb{E}[\widehat{\rho}_{p,1}^V(u)^2] &= \frac{\rho}{p} \mathbb{E}[1/|\mathcal{V}_o(X_p)|] = \frac{\rho}{p} \int_0^\infty \frac{1}{t} (2p\rho)^2 t e^{-2p\rho t} dt = 4p\rho^3 \int_0^\infty e^{-2p\rho t} dt \\ &= \frac{4p\rho^3}{2p\rho} = 2\rho^2, \end{aligned}$$

i.e.,  $\text{Var}(\widehat{\rho}_{p,m}^V(u)) \leq \text{Var}(\widehat{\rho}_{p,1}^V(u)) = 2\rho^2 - \rho^2 = \rho^2$  by Theorem 3.

## 2 Estimation error plots

This section provides plots of the estimated bias and variance for  $\hat{\rho}_{p,m}^V(u)$ , for each of the models described in Section 4 of the paper, when  $m = 400$  and  $p = 0.01, 0.1, 0.3, 0.5, 0.7, 1$ . The estimates are generated by means of 500 realisations of each model. Also, box plots of average, average absolute, minimum, and maximum point-wise errors for each model are presented. We additionally provide the above for kernel intensity estimates, with bandwidths selected by means of Poisson likelihood cross-validation (Baddeley et al., 2015; Loader, 1999), hereinafter `ppl`, and the method of Cronie and Van Lieshout (2018), hereinafter `CvL`.

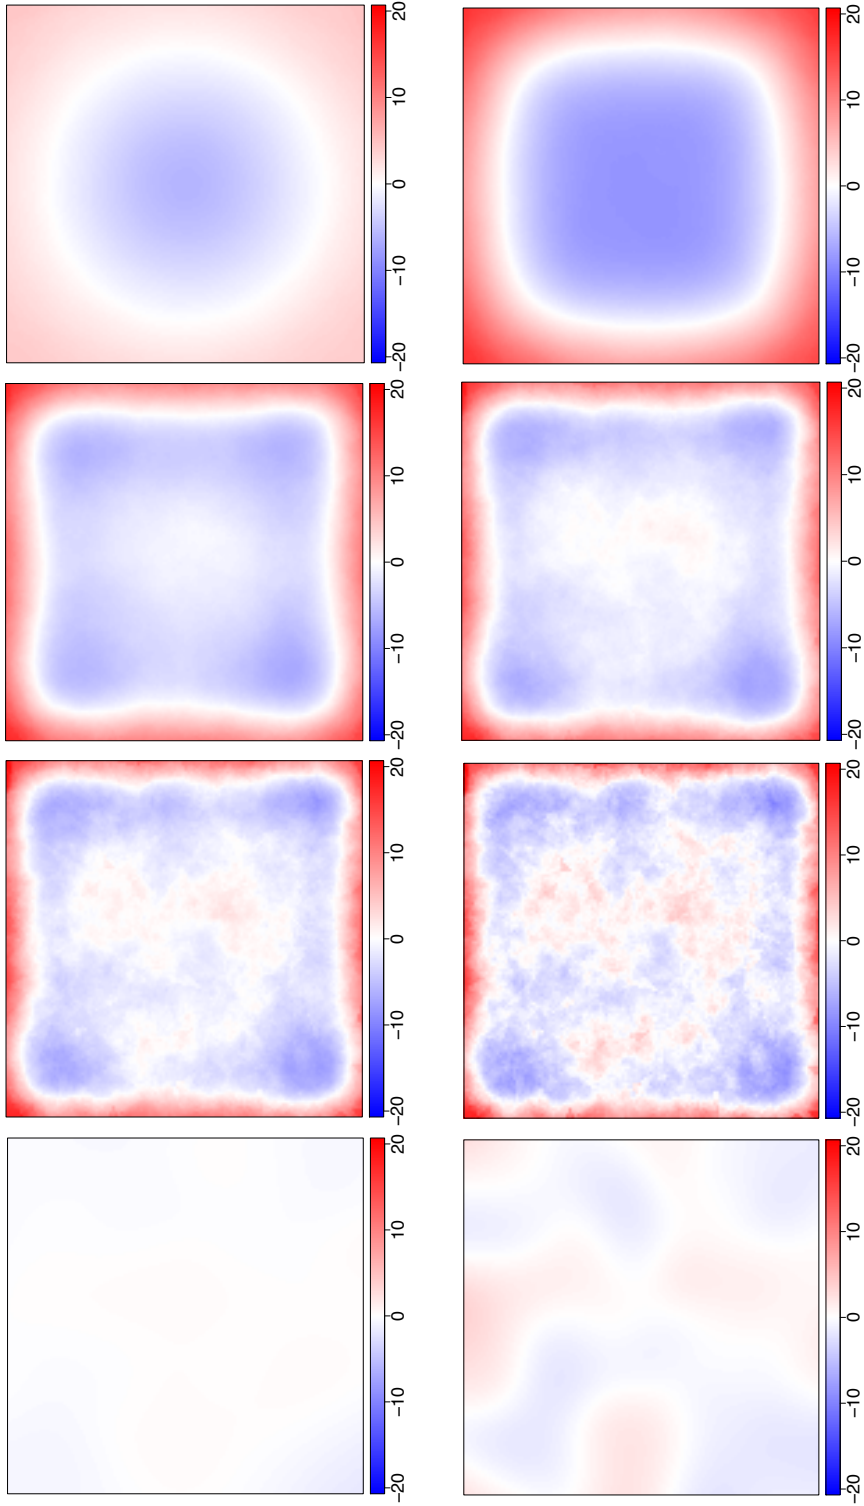

**Fig. 1** Estimated bias for  $\hat{\rho}_{p,m}^V(u)$ ,  $u \in W = [0, 1]^2$ ,  $m = 400$ , and kernel estimators, based on 500 realisations of a homogeneous Poisson process  $X \subset W = [0, 1]^2$  with intensity  $\rho = 60$ . From top-left to bottom-right:  $\hat{\rho}_{p,m}^V(u)$  with  $p = 0.01, 0.1, 0.3, 0.5, 0.7, 1$ ; kernel estimators with bandwidths selected using ppl (left) CvL (right) are on the last row.

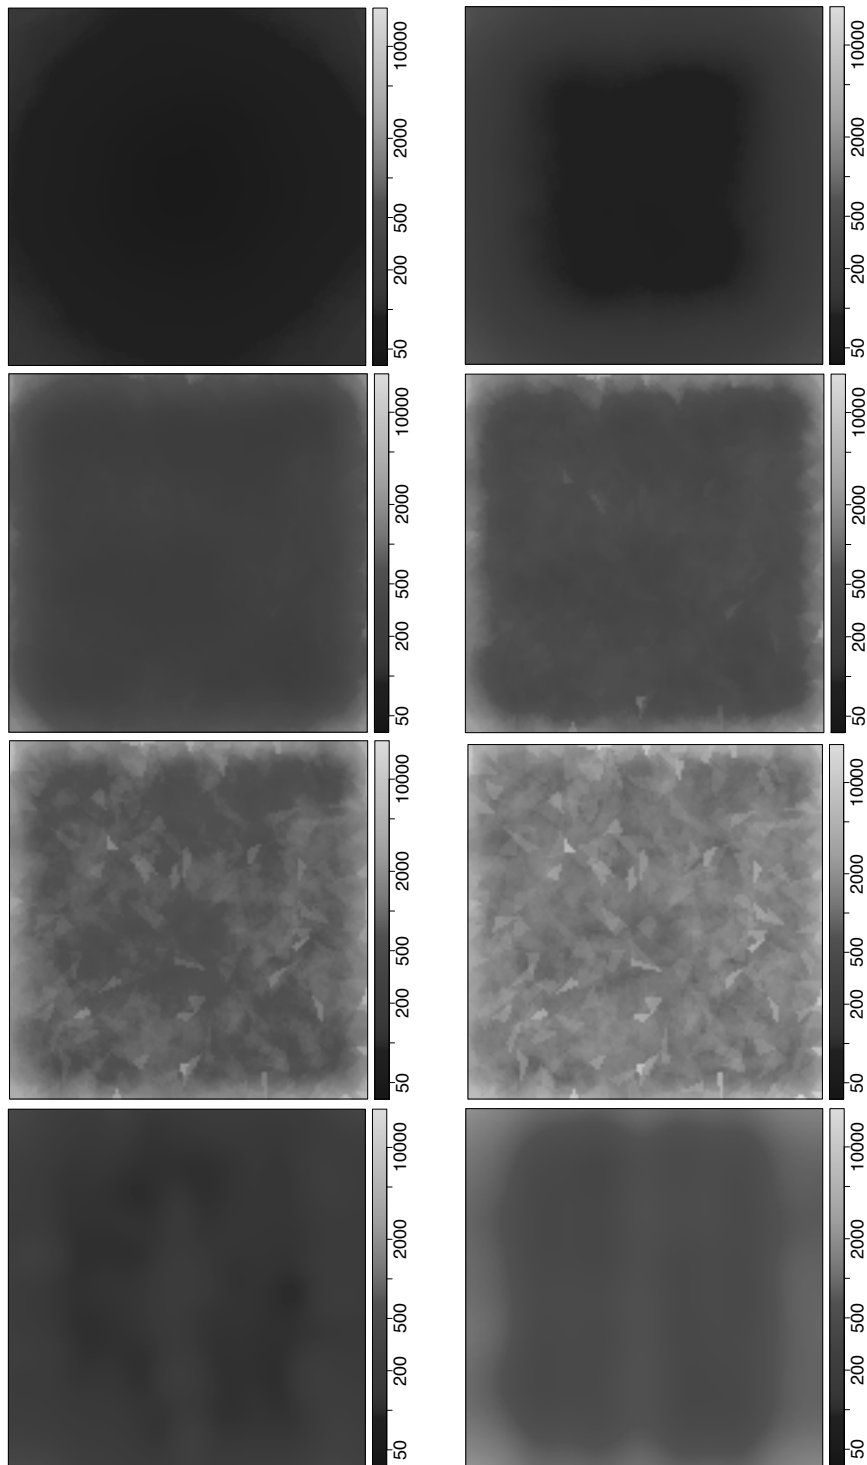

**Fig. 2** Estimated variance for  $\hat{\rho}_{p,m}^V(u)$ ,  $u \in W = [0, 1]^2$ ,  $m = 400$ , and kernel estimators, based on 500 realisations of a homogeneous Poisson process  $X \subset W = [0, 1]^2$  with intensity  $\rho = 60$ . From top-left to bottom-right:  $\hat{\rho}_{p,m}^V(u)$  with  $p = 0.01, 0.1, 0.3, 0.5, 0.7, 1$ ; kernel estimators with bandwidths selected using `ppl` (left) `CvL` (right) are on the last row. Logarithmic colour map.

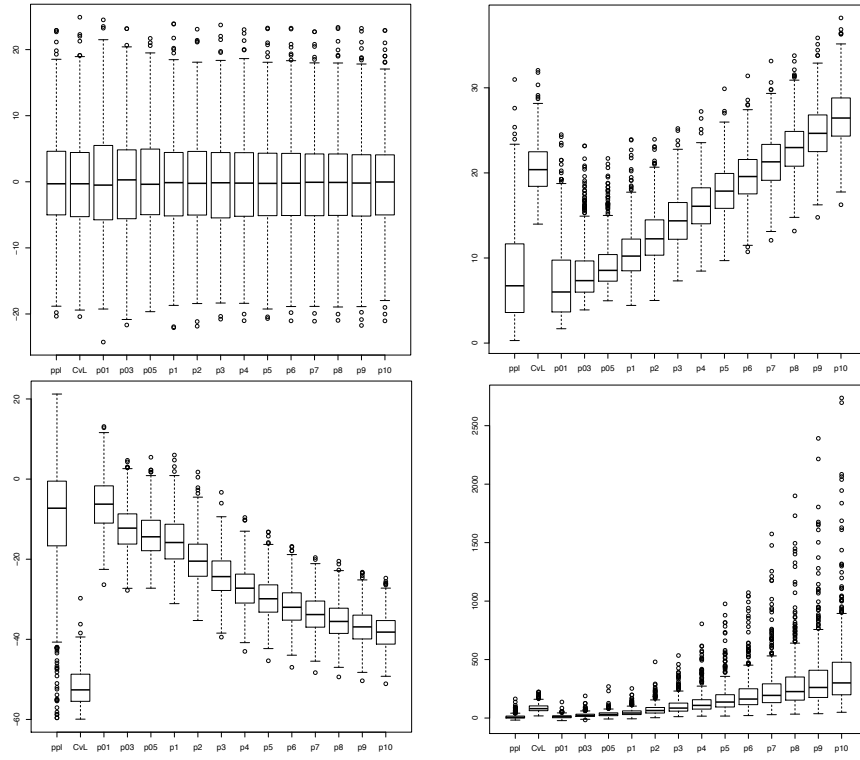

**Fig. 3** Box plots for point-wise errors of  $\hat{\rho}_{p,m}^V(u)$ ,  $u \in W = [0, 1]^2$ ,  $m = 400$ , and kernel estimates, based on 500 realisations of a homogeneous Poisson process  $X \subset W = [0, 1]^2$  with intensity  $\rho = 60$ . From top-left to bottom-right: average; average absolute; minimum and maximum. x-axis labels from left to right: ppl, CvL,  $p = 0.01, 0.03, 0.05, 0.1, 0.2, 0.3, 0.4, 0.5, 0.6, 0.7, 0.8, 0.9, 1$ .



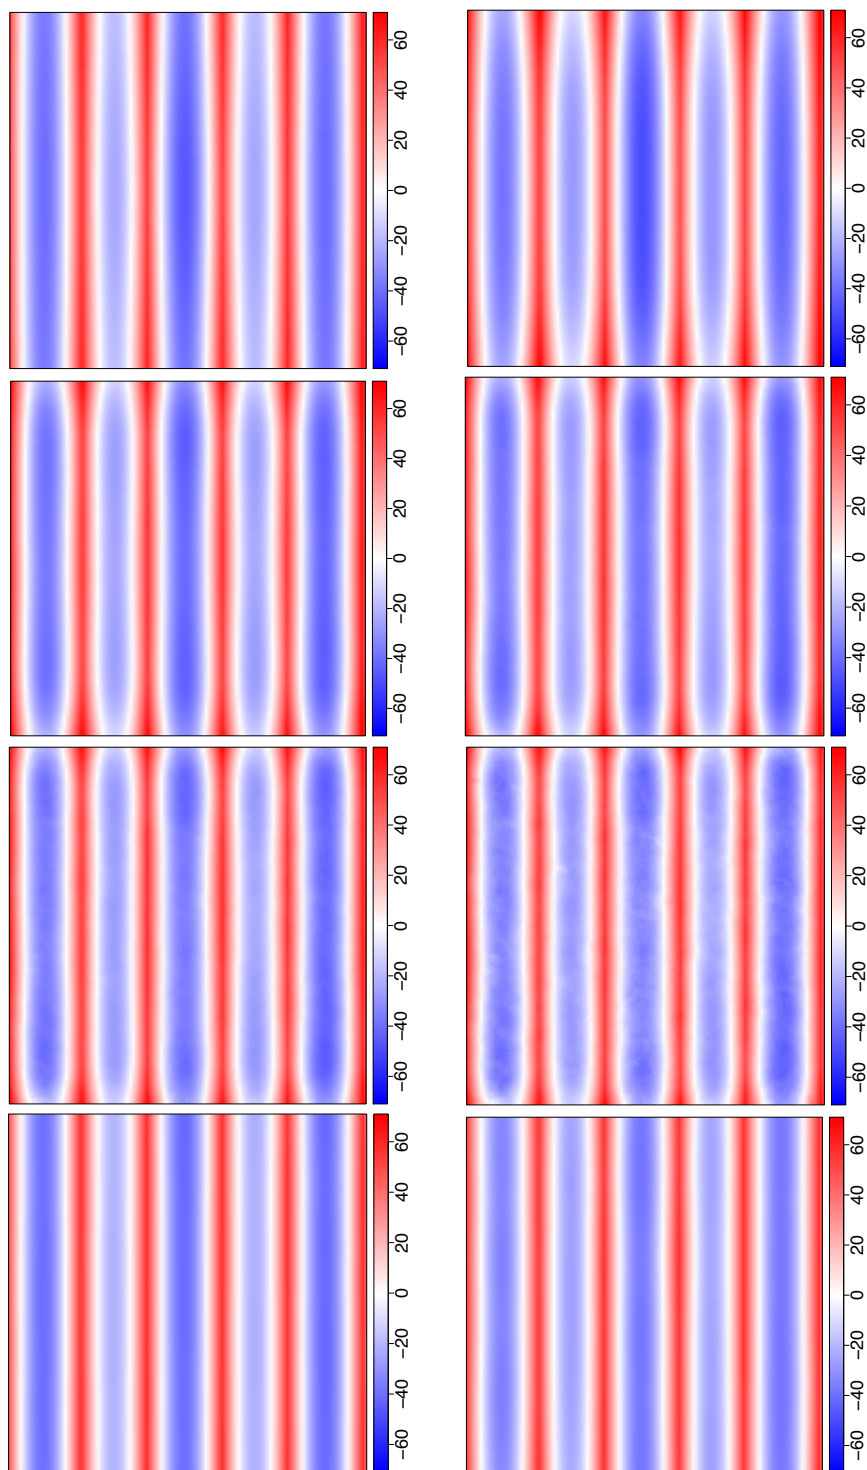

**Fig. 4** Estimated bias for  $\hat{\rho}_{p,m}^V(u)$ ,  $u \in W = [0, 1]^2$ ,  $m = 400$ , and kernel estimators, based on 500 realisations of an inhomogeneous Poisson process  $X \subset W = [0, 1]^2$  with intensity  $\rho(x, y) = |10 + 90 \sin(16x)|$ . From top-left to bottom-right:  $\hat{\rho}_{p,m}^V(u)$  with  $p = 0.01, 0.1, 0.3, 0.5, 0.7, 1$ ; kernel estimators with bandwidths selected using  $ppl$  (left)  $CvL$  (right) are on the last row.

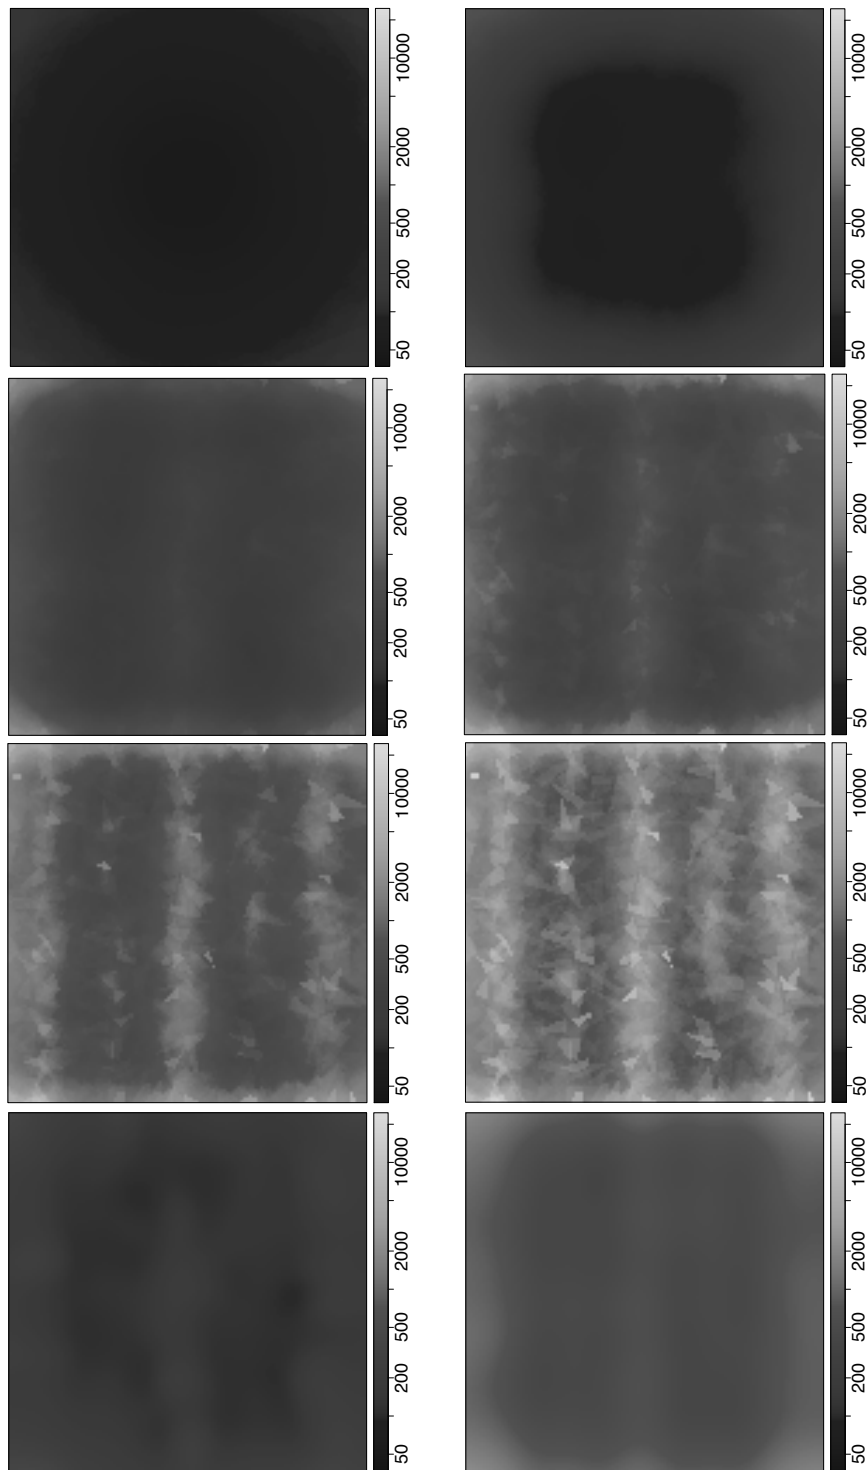

**Fig. 5** Estimated bias for  $\hat{\rho}_{p,m}^V(u)$ ,  $u \in W = [0, 1]^2$ ,  $m = 200$ , and kernel estimators, based on 500 realisations of an inhomogeneous Poisson process  $X \subset W = [0, 1]^2$  with intensity  $\rho(x, y) = |10 + 90 \sin(16x)|$ . From top-left to bottom-right:  $\hat{\rho}_{p,m}^V(u)$  with  $p = 0.01, 0.1, 0.3, 0.5, 0.7, 1$ ; kernel estimators with bandwidths selected using `ppl` (left) `CvL` (right) are on the last row. Logarithmic colour map.

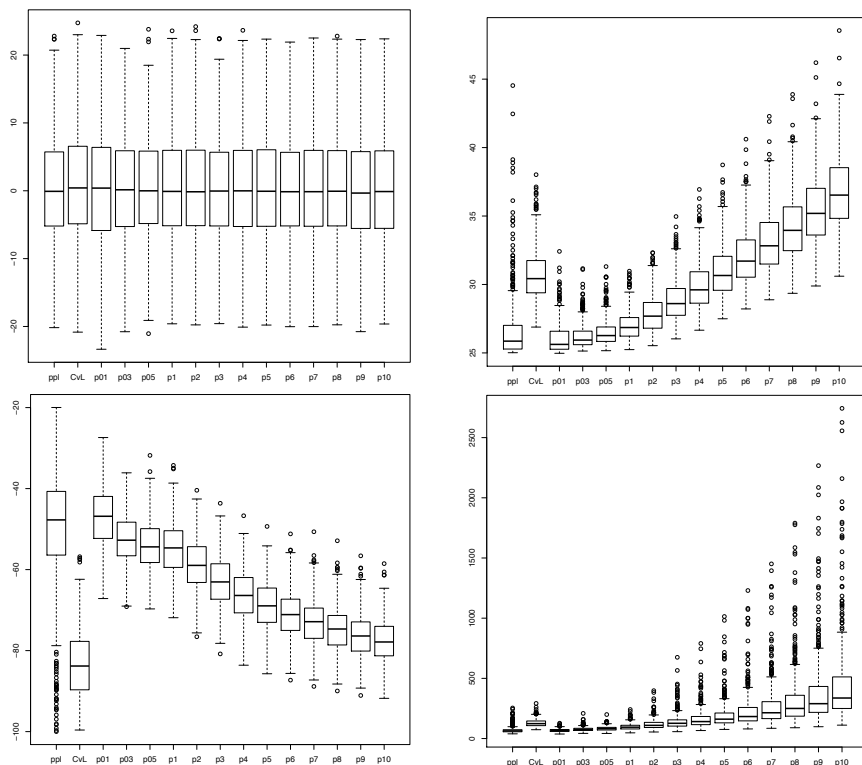

**Fig. 6** Box plots for point-wise errors of  $\hat{\rho}_{p,m}^V(u)$ ,  $u \in W = [0, 1]^2$ ,  $m = 400$ , and kernel estimators, based on 500 realisations of an inhomogeneous Poisson process  $X \subset W = [0, 1]^2$  with intensity  $\rho(x, y) = |10 + 90 \sin(16x)|$ . From top-left to bottom-right: average; average absolute; minimum and maximum. x-axis labels from left to right: ppl, CvL,  $p = 0.01, 0.03, 0.05, 0.1, 0.2, 0.3, 0.4, 0.5, 0.6, 0.7, 0.8, 0.9, 1$ .

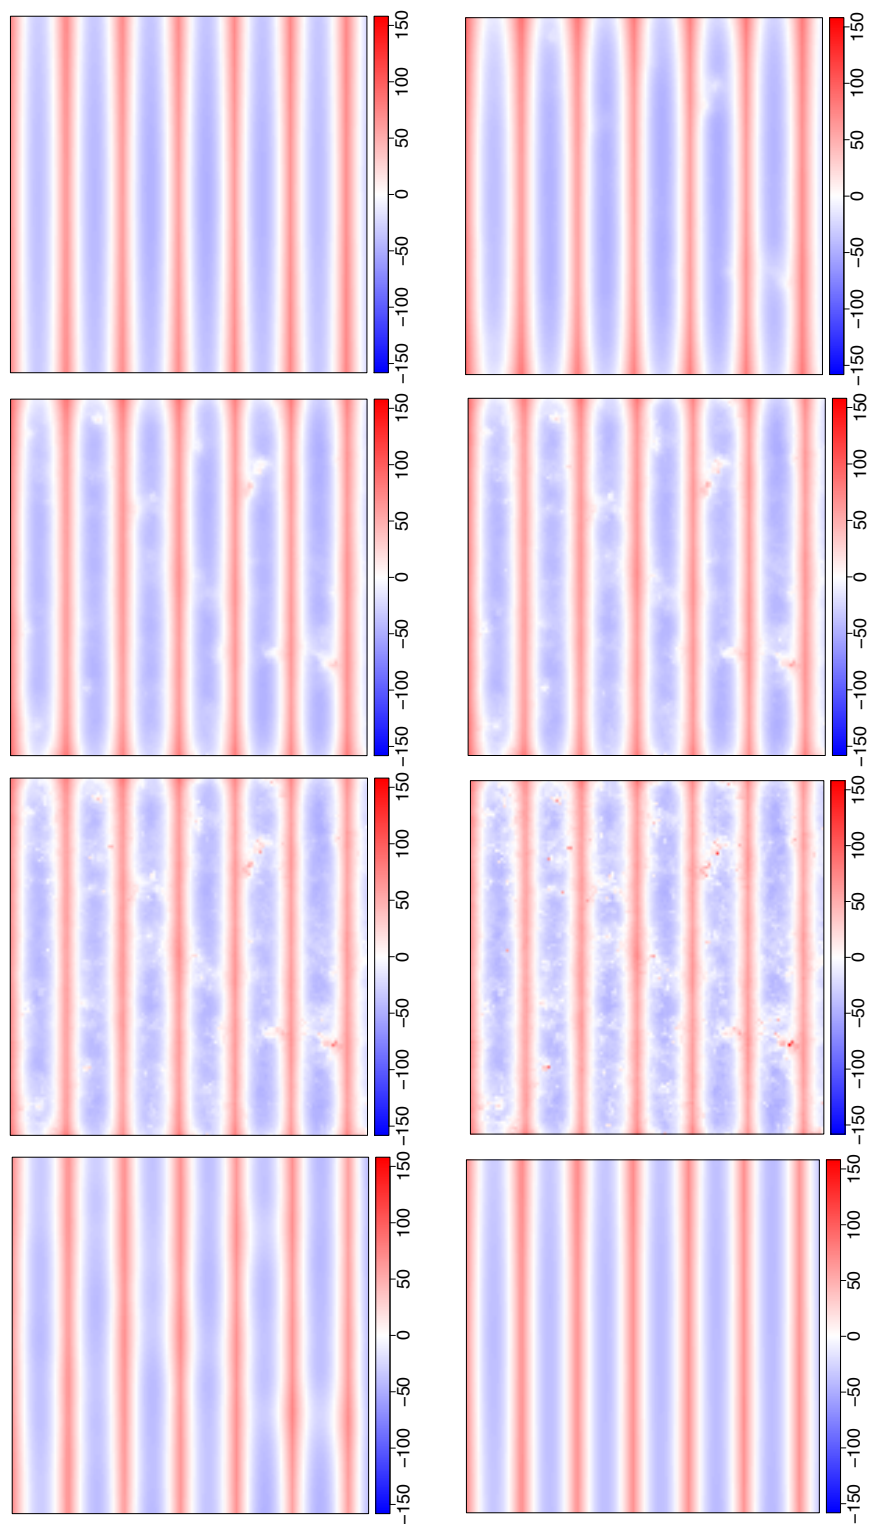

**Fig. 7** Estimated bias for  $\hat{\rho}_{p,m}^V(u)$ ,  $u \in W = [0, 1]^2$ ,  $m = 400$ , and kernel estimators, based on 500 realisations of a log-Gaussian Cox process  $X \subset W = [0, 1]^2$  where the driving Gaussian random field has mean function  $(x, y) \mapsto \log(40|\sin(20x)|)$  and covariance function  $((x_1, y_1), (x_2, y_2)) \mapsto 2 \exp\{-\|(x_1, y_1) - (x_2, y_2)\|/0.1\}$ . From top-left to bottom-right:  $\hat{\rho}_{p,m}^V(u)$  with  $p = 0.01, 0.1, 0.3, 0.5, 0.7, 1$ ; kernel estimators with bandwidths selected using ppl (left) CvL (right) are on the last row.

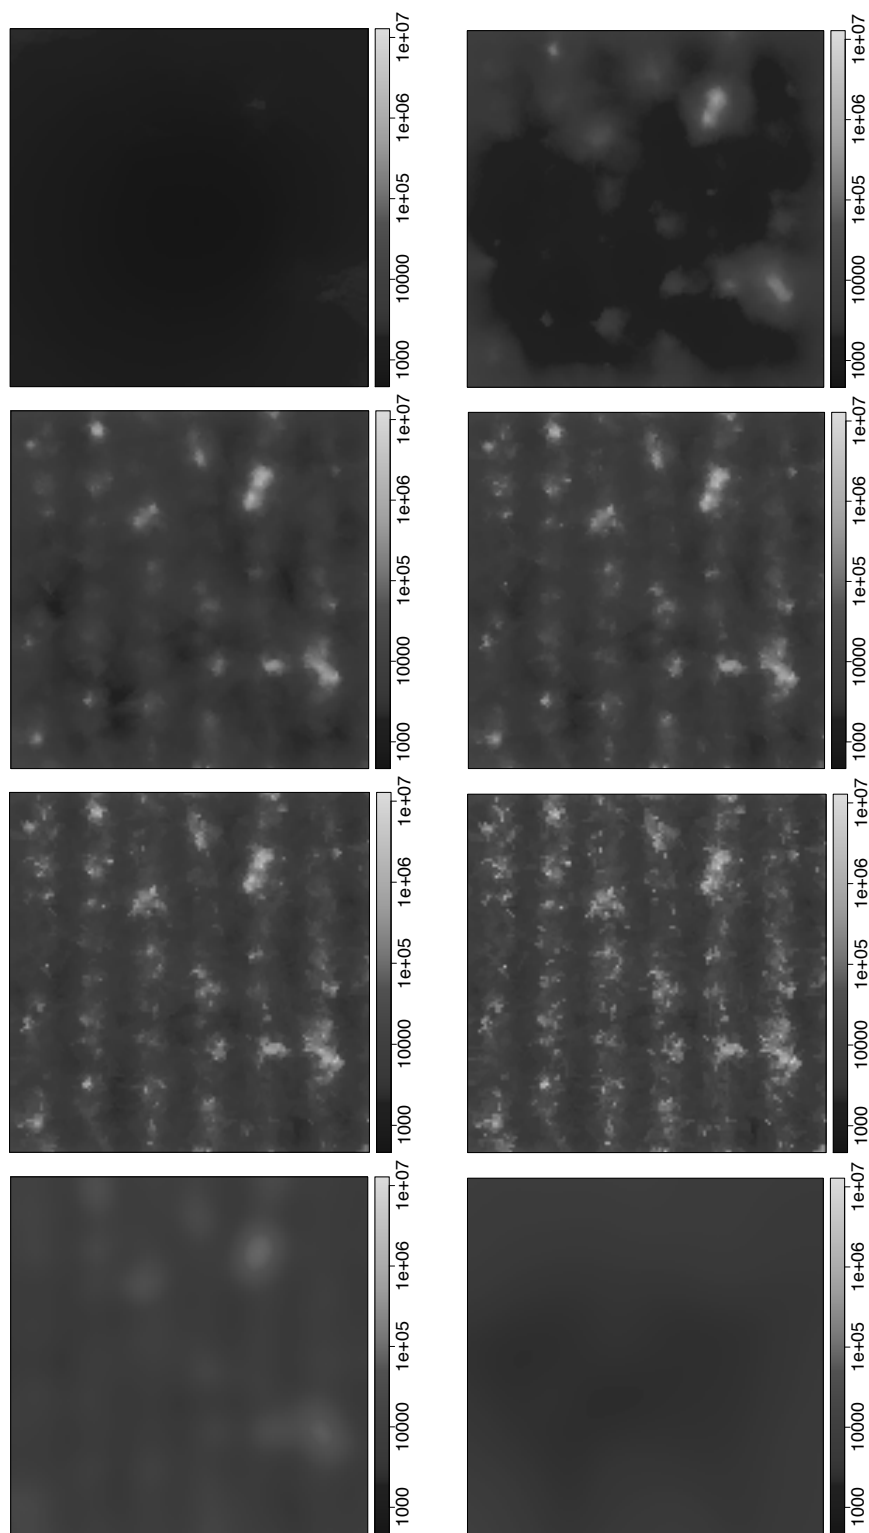

**Fig. 8** Estimated variance for  $\hat{\rho}_{p,m}^V(u)$ ,  $u \in W = [0, 1]^2$ ,  $m = 400$ , and kernel estimators, based on 500 realisations of a log-Gaussian Cox process  $X \subset W = [0, 1]^2$  where the driving Gaussian random field has mean function  $(x, y) \mapsto \log(40|\sin(20x)|)$  and covariance function  $((x_1, y_1), (x_2, y_2)) \mapsto 2 \exp\{-\|(x_1, y_1) - (x_2, y_2)\|/0.1\}$ . From top-left to bottom-right:  $\hat{\rho}_{p,m}^V(u)$  with  $p = 0.01, 0.1, 0.3, 0.5, 0.7, 1$ ; kernel estimators with bandwidths selected using ppl (left) CvL (right) are on the last row. Logarithmic colour map.

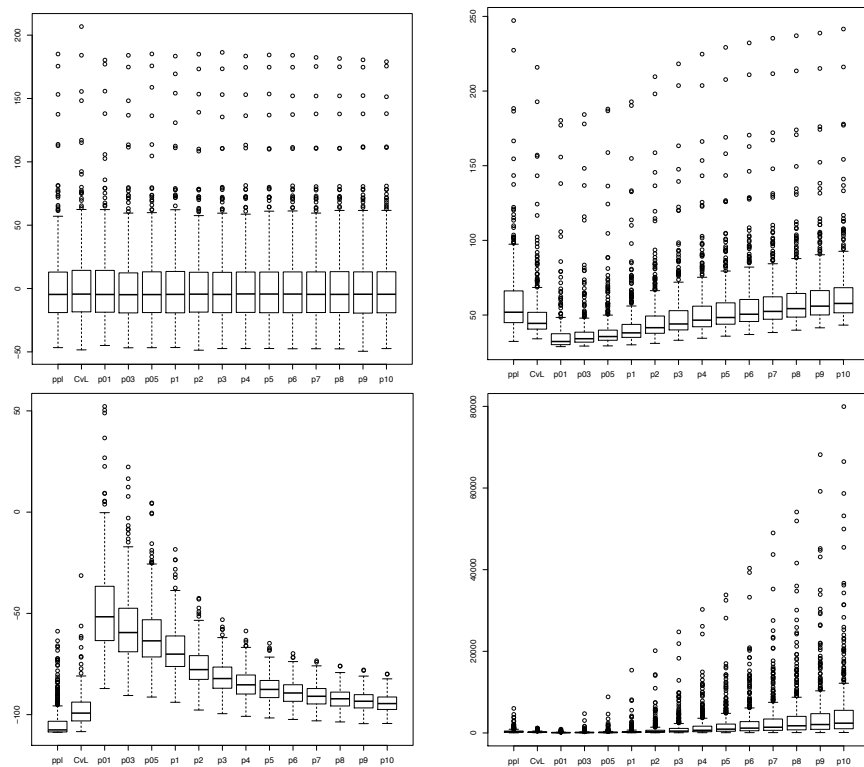

**Fig. 9** Box plots for point-wise errors of  $\hat{\rho}_{p,m}^V(u)$ ,  $u \in W = [0, 1]^2$ ,  $m = 400$ , and kernel estimators, based on 500 realisations of a log-Gaussian Cox process  $X \subset W = [0, 1]^2$  where the driving Gaussian random field has mean function  $(x, y) \mapsto \log(40|\sin(20x)|)$  and covariance function  $((x_1, y_1), (x_2, y_2)) \mapsto 2 \exp\{-\|(x_1, y_1) - (x_2, y_2)\|/0.1\}$ . From top-left to bottom-right: average; average absolute; minimum and maximum. x-axis labels from left to right: ppl, CvL,  $p = 0.01, 0.03, 0.05, 0.1, 0.2, 0.3, 0.4, 0.5, 0.6, 0.7, 0.8, 0.9, 1$ .

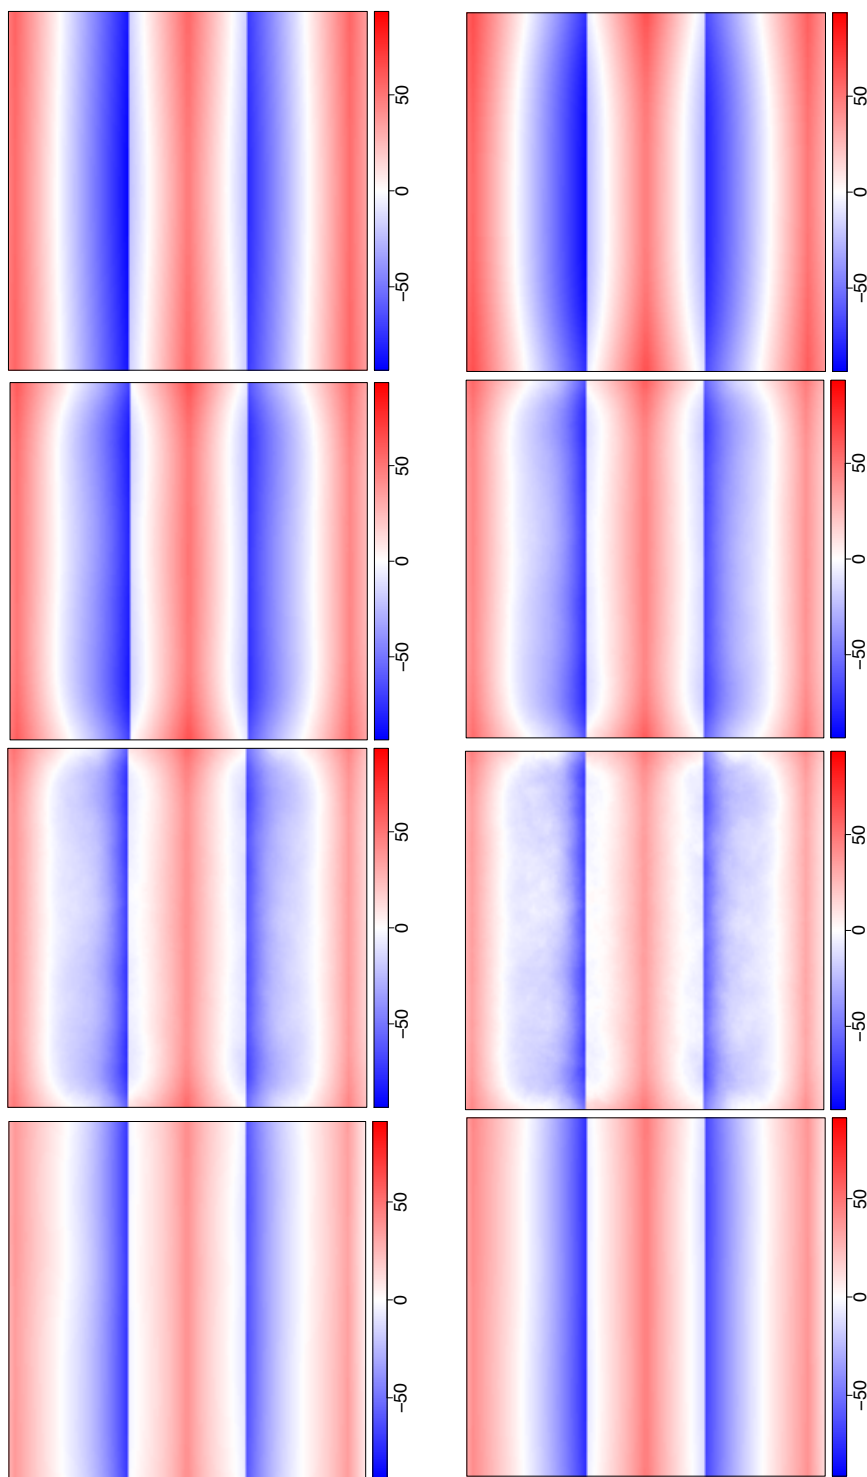

**Fig. 10** Estimated bias for  $\hat{\rho}_{p,m}^V(u)$ ,  $u \in W = [0, 1]^2$ ,  $m = 400$ , and kernel estimators, based on 500 realisations of an independently thinned simple sequential inhibition process in  $W = [0, 1]^2$  with intensity  $\rho(x, y) = 450p(x, y)$ ,  $p(x, y) = \mathbf{1}\{x < 1/3\}|x - 0.02| + \mathbf{1}\{1/3 \leq x < 2/3\}|x - 0.5| + \mathbf{1}\{x \geq 2/3\}|x - 0.95|$ ,  $x, y \in W$ . From top-left to bottom-right:  $\hat{\rho}_{p,m}^V(u)$  with  $p = 0.01, 0.1, 0.3, 0.5, 0.7, 1$ ; kernel estimators with bandwidths selected using **ppl** (left) **CvL** (right) are on the last row.

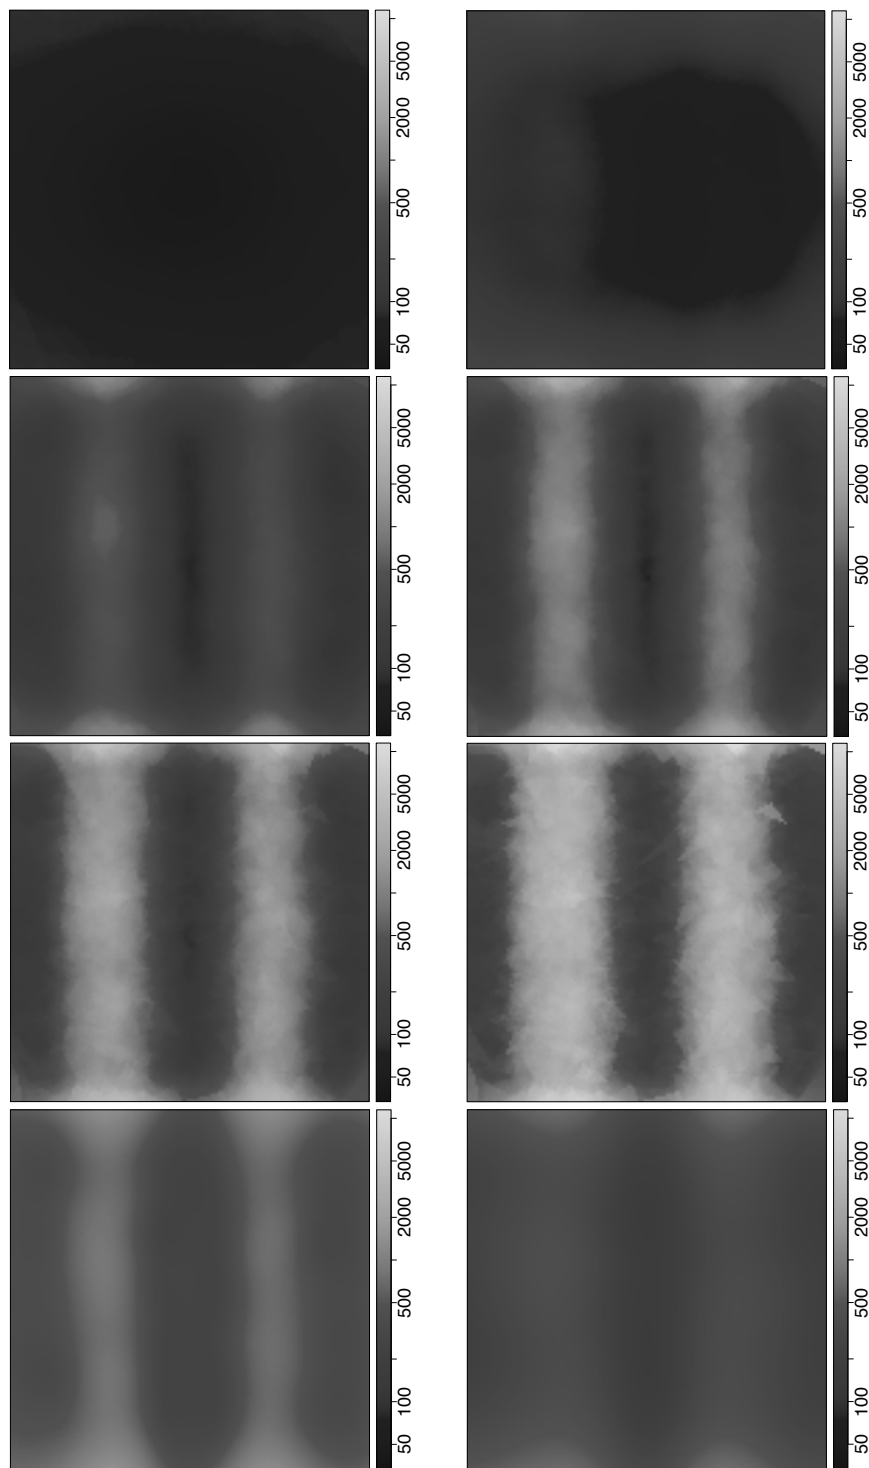

**Fig. 11** Estimated variance for  $\hat{\rho}_{p,m}^V(u)$ ,  $u \in W = [0, 1]^2$ ,  $m = 400$ , and kernel estimators, based on 500 realisations of an independently thinned simple sequential inhibition process in  $W = [0, 1]^2$  with intensity  $\rho(x, y) = 450p(x, y)$ ,  $p(x, y) = \mathbf{1}\{x < 1/3\}|x - 0.02| + \mathbf{1}\{1/3 \leq x < 2/3\}|x - 0.5| + \mathbf{1}\{x \geq 2/3\}|x - 0.95|$ ,  $x, y \in W$ . From top-left to bottom-right:  $\hat{\rho}_{p,m}^V(u)$  with  $p = 0.01, 0.1, 0.3, 0.5, 0.7, 1$ ; kernel estimators with bandwidths selected using ppl (left) CvL (right) are on the last row. Logarithmic colour map.



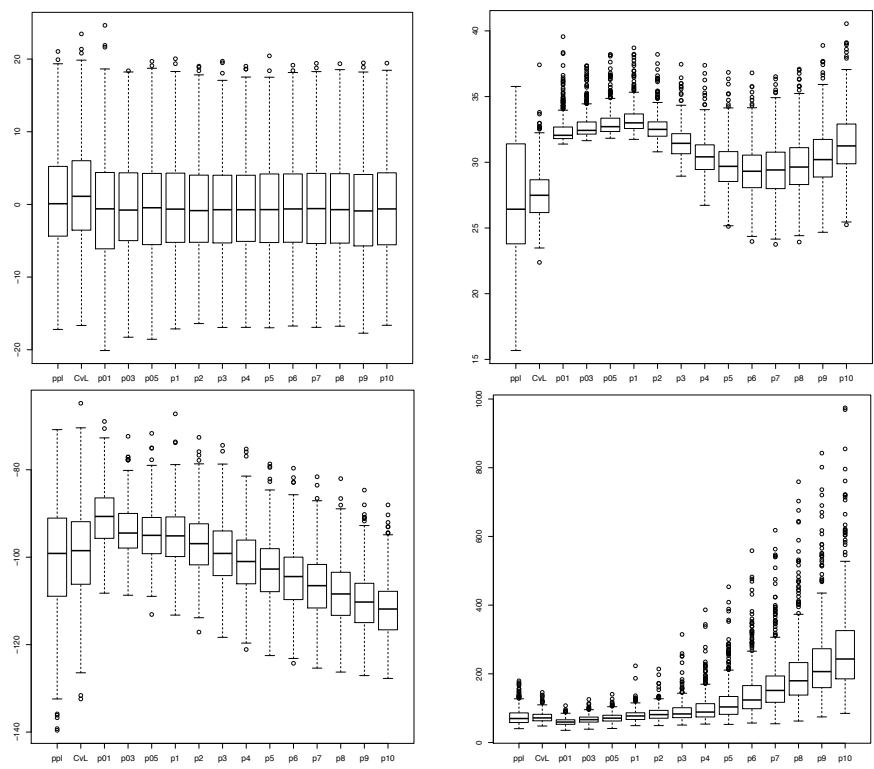

**Fig. 12** Box plots for point-wise errors of  $\hat{\rho}_{p,m}^V(u)$ ,  $u \in W = [0, 1]^2$ ,  $m = 400$ , and kernel estimators, based on 500 realisations of an independently thinned simple sequential inhibition process in  $W = [0, 1]^2$  with intensity  $\rho(x, y) = 450p(x, y)$ ,  $p(x, y) = \mathbf{1}\{x < 1/3\}|x - 0.02| + \mathbf{1}\{1/3 \leq x < 2/3\}|x - 0.5| + \mathbf{1}\{x \geq 2/3\}|x - 0.95|$ ,  $x, y \in W$ . From top-left to bottom-right: average; average absolute; minimum and maximum. x-axis labels from left to right: ppl, CvL,  $p = 0.01, 0.03, 0.05, 0.1, 0.2, 0.3, 0.4, 0.5, 0.6, 0.7, 0.8, 0.9, 1$ .

**References**

- Baddeley A, Rubak E, Turner R (2015) *Spatial Point Patterns: Methodology and Applications with R*. CRC Press
- Cronie O, Van Lieshout M (2018) A non-model-based approach to bandwidth selection for kernel estimators of spatial intensity functions. *Biometrika* 105(2):455–462
- Daley DJ, Vere-Jones D (2008) *An Introduction to the Theory of Point Processes: Volume II: General Theory and Structure*, 2nd edn. Springer-Verlag New York
- Last G (2010) Stationary random measures on homogeneous spaces. *Journal of Theoretical Probability* 23(2):478–497
- Loader C (1999) *Local Regression and Likelihood*. Springer, New York
